# Supplementary material for: Prescription Practices of Cannabinoids in Children with Cere-bral Palsy Worldwide - A Survey of the Swiss Cerebral Palsy Registry
Source: Preprints.org preprint supplement (doi:10.20944/preprints202310.0080.v1), 2023-10-03
Supplement: Supplementary file 1 [file supplementary]

**Table S1.** Characteristics of the participating physicians, with or without experience in treating children with cerebral palsy with cannabinoids.

|  | **Total**  **n=70 (%)** | **Experience**  **n=47 (%)** | | **No experience**  **n=23 (%)** | **p-value** | |
| --- | --- | --- | --- | --- | --- | --- |
| **Sex** |  |  | |  | 0.96 | |
| Male | 25 (36) | 17 (36) | | 8 (35) |  | |
| Female | 43 (61) | 29 (62) | | 14 (61) |  | |
| Unknown | 2 (3) | 1 (2) | | 1 (4) |  | |
| **Age in years (interquartile range)** | 48 (42-57) | 47.5 (41-56) | | 50 (42-60) | 0.92 | |
| **Specialisation1** |  |  | |  |  | |
| Paediatrics | 45 (64) | 33 (70) | | 12 (52) | 0.14 | |
| Physical Medicine and Rehabilitation | 28 (40) | 18 (38) | | 10 (44) | 0.80 | |
| Neurology | 10 (14) | 8 (17) | | 2 (9) | 0.35 | |
| Anaesthesia | 1 (1) | 0 | | 1 (4) | 0.33 | |
| **Subspecialisation** |  |  | |  |  | |
| Yes | 53 (76) | 39 (88) | | 14 (61) | 0.04 | |
| Neuropediatric | 28 (40) | 19 (40) | | 9 (39) | 0.92 | |
| Pediatric rehabilitation medicine | 21 (30) | 18 (38) | | 3 (13) | 0.05 | |
| Developmental paediatrics | 8 (11) | 5 (11) | | 3 (13) | 1.0 | |
| Pediatric palliative care | 5 (7) | 3 (6) | | 2 (9) | 1.0 | |
| Pediatric oncology-haematology | 1 (1) | 1 (2) | | 0 (0) | 1.0 | |
| Neurometabolic | 1 (1) | 0 (0) | | 1 (4) | 1.0 | |
| No | 17 (24) | 8 (17) | | 9 (39) |  | |
| **Work experience in specialty in years** |  |  | |  | 0.81 | |
| 0-5 | 12 (17) | 8 (17) | | 4 (32) |  | |
| 6-10 | 13 (19) | 8 (17) | | 5 (22) |  | |
| 11-15 | 10 (14) | 8 (17) | | 2 (9) |  | |
| >15 | 35 (50) | 23 (49) | | 12 (52) |  | |
| **Work experience in the treatment of children with CP in years** |  |  | |  | 0.72 | |
| 0-5 | 15 (21) | 9 (19) | | 6 (26) |  | |
| 6-10 | 16 (23) | 11 (23) | | 5 (22) |  | |
| 11-15 | 18 (26) | 14 (30) | | 4 (17) |  | |
| >15 | 21 (30) | 13 (28) | | 8 (35) |  | |
| **Workplace1** |  |  | |  | 0.01 | |
| Any hospital | 56 (80) | 42 (89) | | 14 (61) |  | |
| University hospital | 23 (33) | 20 (43) | | 3 (13) |  | |
| General hospital | 27 (39) | 18 (38) | | 9 (39) |  | |
| University and general hospital | 6 (9) | 4 (8) | | 2 (9) |  | |
| Rehabilitation centre | 12 (17) | 4 (8) | | 8 (35) |  | |
| Private/Joined practice | 2 (3) | 2 (4) | | 0 (0) |  | |
| **Knowledge Acquisition1** |  |  | |  |  | |
| Individual learning | 45 (64) | 33 (70) | | 12 (52) | 0.14 | |
| Colleagues | 28 (40) | 19 (40) | | 9 (39) | 0.92 | |
| Conferences | 17 (24) | 11 (23) | | 6 (26) | 0.81 | |
| Part of education | 15 (21) | 10 (21) | | 5 (22) | 0.97 | |
| Parents & families | 10 (14) | 7 (15) | | 3 (13) | 0.84 | |
| Institution | 8 (11) | 6 (13) | | 2 (9) | 0.62 | |
| Companies | 2 (3) | 1 (2) | | 1 (4) | 0.60 | |
| **Country of Residence (grouped)** |  |  |  | | 0.004 | | |
| Switzerland | 23 (33) | 15 (32) | | 8 (35) |  |
| Europe excluding Switzerland | 27 (39) | 13 (28) | | 14 (61) |  |
| North America | 18 (26) | 18 (38) | | 0 (0) |  |
| Australia | 2 (3) | 1 (2) | | 1 (4) |  |
